# Supplementary material
Source: publisher figshare collection journal article supplement (https://frontiersin.figshare.com/ndownloader/files/16335227)
Supplement: Supplementary file [file 16335227]

## *Supplementary material*

### **The inducible microRNA-21 negatively modulates the inflammatory response in teleost fish via targeting IRAK4**

Qing Chu<sup>1,3,4</sup>, Xiaolong Yan<sup>1,3,4</sup>, Lihua Liu<sup>1,3,4</sup>, Tianjun Xu<sup>1,2,3,4,5\*</sup>

1. *Laboratory of Fish Molecular Immunology, College of Fisheries and Life Science, Shanghai Ocean University, Shanghai, 201306, China*
2. *Laboratory of Marine Biology and Biotechnology, Qingdao National Laboratory for Marine Science and Technology, Qingdao, China*
3. *National Pathogen Collection Center for Aquatic Animals, Shanghai Ocean University, 201306, China*
4. *Key Laboratory of Exploration and Utilization of Aquatic Genetic Resources (Shanghai Ocean University), Ministry of Education, 201306, China*
5. *International Research Center for Marine Biosciences at Shanghai Ocean University, Ministry of Science and Technology, 201306, China*

\*Corresponding author. Dr. Tianjun Xu

E-mail: tianjunxu@163. com

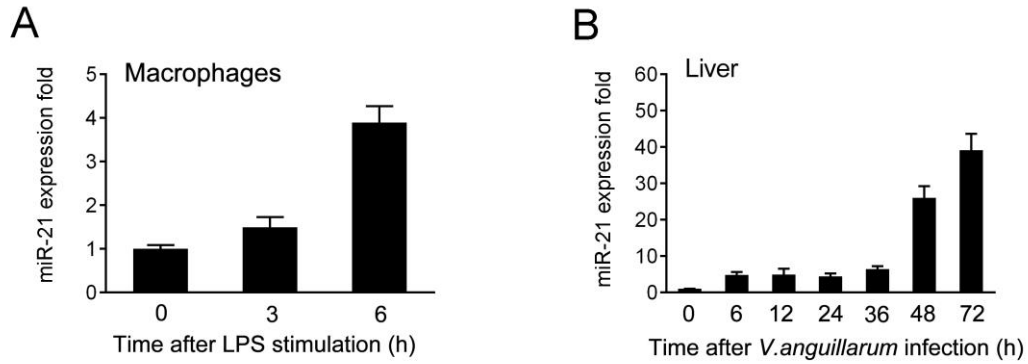

**Supplementary Figure 1. The supplementary experiment for the expression analysis of miR-21.** (A) Expression profiles of miR-21 in LPS stimulated miiuy croaker macrophages. (B) Expression profiles of miR-21 after *V. anguillarum* infection in liver. The relative expression of miRNA were normalized to that of internal control U6 snRNA expression. Results are standardized to 1 in control samples. Data represented the mean  $\pm$  SE from three independent triplicated experiments.

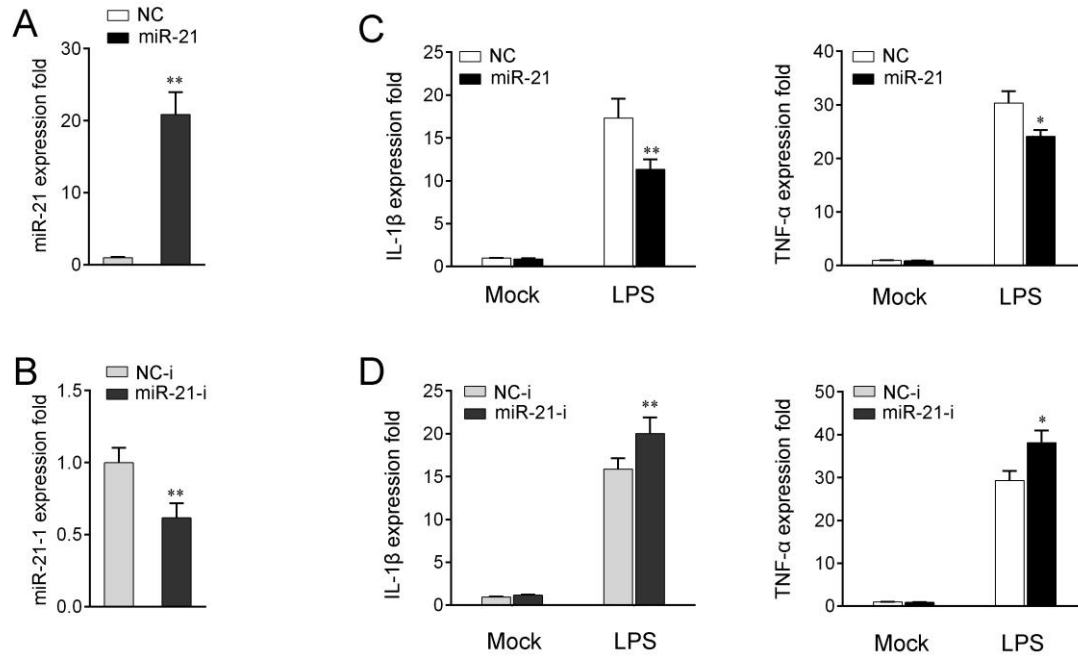

**Supplementary Figure 2. The supplementary experiment for miR-21 suppresses LPS-induced inflammatory cytokine expression.** (A, B) Miiuy croaker macrophages were transfected with control mimics (NC) or miR-21 mimics (miR-21) (A) and miR-21 inhibitors (miR-21-i) and control inhibitors (NC-i) (B). At 48 h post-transfection, miR-21 expression was measured by qRT-PCR and normalized by U6 snRNA expression. (C, D) Macrophages were transfected with miR-21 or NC (C) and miR-21-i or NC-i (D) for 48 h. Then, the cells were stimulated with LPS and the expression levels of IL-1 $\beta$  and TNF- $\alpha$  were analyzed by qRT-PCR and normalized by glyceraldehyde 3-phosphate dehydrogenase (GAPDH) expression. Results are standardized to 1 in control cells. Data are presented as the means  $\pm$  SE from three independent triplicated experiments. \*\*,  $p < 0.01$ ; \*,  $p < 0.05$  versus the controls.
